# Supplementary material
Source: Elsevier journal article supplement (https://www.sciencedirect.com/science/article/pii/S021391111630098X)
Supplement: mmc1 [file S021391111630098X:mmc1.pdf]

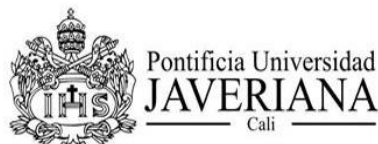

## ENCUESTA DE ACCESO A SERVICIOS DE SALUD PARA HOGARES COLOMBIANOS – EASS

Arrivillaga, Aristizabal, Pérez & Estrada, 2016

Código  
encuesta:

\_\_\_\_|\_\_\_\_|\_\_\_\_|

Buenos días/tardes. Mi nombre es ..... Estamos realizando una encuesta de acceso a los servicios de salud en hogares para un proyecto de investigación de la Universidad Javeriana de Cali. Esta vivienda fue seleccionada aleatoriamente para el estudio para lo cual solicitamos la participación del **Jefe/a** del Hogar o de una persona mayor de edad. La información que puedan brindarnos es muy importante. La duración de la encuesta es aproximadamente 60 minutos donde se indagará sobre el uso de los servicios de salud, barreras que perciben los usuarios, calidad de la atención, entre otros. La información que se genere de este estudio será confidencial y utilizada únicamente para fines de la investigación. Gracias por participar.

### Identificación del hogar

Barrio: \_\_\_\_\_

N° de manzana: \_\_\_\_|\_\_\_\_|\_\_\_\_|

Dirección: \_\_\_\_\_

N° de vivienda: \_\_\_\_|\_\_\_\_|\_\_\_\_|

Nombre del encuestado: \_\_\_\_\_

C.C. \_\_\_\_\_

Teléfono: \_\_\_\_\_

Tipo: 1. ☐ **Jefe/a del hogar**

Fecha de la entrevista:

2. ☐ Adulto informante

\_\_\_\_|\_\_\_\_| - \_\_\_\_|\_\_\_\_| - \_\_\_\_|\_\_\_\_|\_\_\_\_|  
DÍA MÊS AÑO

Consentimiento informado:

0. ☐ No

1. ☐ Sí

### Módulo 1: Perfil Sociodemográfico del **Jefe/a** del Hogar o Adulto Informante

1) ¿Es hombre o mujer? (**Observación**) 1. ☐ Hombre 2. ☐ Mujer

2) ¿Cuántos años cumplidos tiene usted? \_\_\_\_|\_\_\_\_| años

3) De acuerdo con su cultura, pueblo o rasgos físicos, ¿usted se reconoce como?\*

1. ☐ Indígena

4. ☐ Gitano (ROM)

2. ☐ Raizal del archipiélago

5. ☐ Palenquero de San Basilio

3. ☐ Negro, Mulato, Afrocolombiano, Afrodescendiente

6. ☐ Ninguno (Mestizo)

4) ¿Cuál es o fue el nivel de educación más alto alcanzado del **Jefe/a** del Hogar?

1. ☐ Algunos años de primaria

6. ☐ Técnica o tecnológica completa

2. ☐ Toda la primaria

7. ☐ Uno o más años de universidad

3. ☐ Algunos años de secundaria

8. ☐ Universitaria completa

4. ☐ Toda la secundaria

9. ☐ Ninguno

5. ☐ Uno o más años de técnica o tecnológica

10. ☐ NS/NR

5) ¿Cuál es su estado civil actual?

1. ☐ Casado
  2. ☐ Unión libre
  3. ☐ Separado
  4. ☐ Viudo
  5. ☐ Soltero
  6. ☐ No responde
- 6) Marque la opción o perfil que más se ajuste a la situación laboral u ocupacional del **Jefe/a** del Hogar en el momento actual o de la última ocupación:
1. ☐ Obrero o empleado de empresa particular
  2. ☐ Obrero o empleado del gobierno
  3. ☐ Empleado domestico
  4. ☐ Trabajador por cuenta propia (no calificados, microempresarios con menos de 5 trabajadores)
  5. ☐ Trabajador por cuenta propia (Profesionales y técnicos)
  6. ☐ Patrón o empleador (empresa con 5 trabajadores o más)
  7. ☐ Trabajador familiar sin remuneración
  8. ☐ Trabajador sin remuneración en empresas o negocios de otros hogares
  9. ☐ Jornalero o peón.
  10. ☐ Pensionado
  11. ☐ Otro . Cual \_\_\_\_\_
  12. ☐ NS/NR
- 7) ¿A qué EPS está afiliado? \_\_\_\_\_ ☐ No afiliado a ninguna EPS
- 8) ¿Su régimen de salud es? (**Entrevistador: Solicite el carnet y diligencie**)
1. ☐ Contributivo → ¿El tipo de afiliación es? 1. ☐ Cotizante 2. ☐ Beneficiario
  2. ☐ Subsidiado
  3. ☐ No afiliado
  4. ☐ Especial (fuerzas militares, maestros, policías, Ecopetrol, ferrocarriles etc.)
- 9) ¿Cuál es el ingreso del **Jefe/a** del Hogar?
1. ☐ Menos de 1 SMMLV (< \$ 644.350)
  2. ☐ Entre 1 y 3.5 SMMLV (\$ 644.351 hasta \$ 2.255.225)
  3. ☐ Entre 3.6 y 6 SMMLV (\$2.255.226 hasta \$ 3.866.100)
  4. ☐ más de 6 SMMLV (> \$ 3.866.101)
  5. ☐ NS/NR

## Módulo 2. Perfil socioeconómico del Hogar

- 1) Cuál es el estrato socioeconómico de la vivienda? [\_\_\_\_] 1 hasta 6  
(**Verificar con recibo de servicios públicos**)
- 2) ¿Cuál considera usted que son los ingresos mensuales de su hogar?
1. ☐ Menos de 1 SMMLV (< \$ 644.350)
  2. ☐ Entre 1 y 3.5 SMMLV (\$ 644.351 hasta \$ 2.255.225)
  3. ☐ Entre 3.6 y 6 SMMLV (\$2.255.226 hasta \$ 3.866.100)
  4. ☐ más de 6 SMMLV (> \$ 3.866.101)
  5. ☐ NS/NR
- 3) La vivienda que ocupa este hogar es:
1. ☐ Propia pagada
  2. ☐ Propia pagando
  3. ☐ Arriendo
  4. ☐ Familiar
  5. ☐ Otra
  6. ☐ NS/NR

## 4) Zona de ubicación de la vivienda

1. ☐ Cabecera municipal (urbano)
2. ☐ Resto (centro poblado, corregimiento, inspección, caserío)
3. ☐ Resto (rural disperso)

**Módulo 3: Acceso a Servicios Preventivos**

**A CONTINUACIÓN SE LE REALIZARÁN PREGUNTAS SOBRE LOS SERVICIOS DE PREVENCIÓN A LOS QUE HAN ACCESO USTED O ALGUNOS INTEGRANTES DE SU HOGAR, DE ACUERDO CON SU EDAD.**

1) Sin estar enfermo(a) y por prevención ¿usted o algún miembro de este hogar consultó en el último año?

1. ☐ Solo al médico
2. ☐ Sólo al odontólogo
3. ☐ Al médico y al odontólogo
4. ☐ A ninguno → **Pase a pregunta 10)**

**Entrevistador: De acuerdo con el rango de edad de los integrantes del hogar indagar por los siguientes servicios preventivos según corresponda.**

2) Servicios preventivos primer año de vida:

¿En este hogar hay niños menores de 1 año? SI ☐ ¿Cuántos?   NO ☐

| Tipo de servicio                                     | ¿Cuáles de los siguientes servicios su EPS le ha ofrecido en el último año? |                             |                             | SELECCIONE EL CASO MAS RECIENTE EN ESTE GRUPO DE EDAD |                             |                             |
|------------------------------------------------------|-----------------------------------------------------------------------------|-----------------------------|-----------------------------|-------------------------------------------------------|-----------------------------|-----------------------------|
|                                                      | Si                                                                          | No                          | NS/NR                       | Si                                                    | No                          | NS/NR                       |
| 1. Control post-parto                                | 1. <input type="checkbox"/>                                                 | 0. <input type="checkbox"/> | 2. <input type="checkbox"/> | 1. <input type="checkbox"/>                           | 0. <input type="checkbox"/> | 2. <input type="checkbox"/> |
| 2. Valoración integral del recién nacido             | 1. <input type="checkbox"/>                                                 | 0. <input type="checkbox"/> | 2. <input type="checkbox"/> | 1. <input type="checkbox"/>                           | 0. <input type="checkbox"/> | 2. <input type="checkbox"/> |
| 3. Visita domiciliaria al recién nacido y su familia | 1. <input type="checkbox"/>                                                 | 0. <input type="checkbox"/> | 2. <input type="checkbox"/> | 1. <input type="checkbox"/>                           | 0. <input type="checkbox"/> | 2. <input type="checkbox"/> |
| 4. Controles de niño sano                            | 1. <input type="checkbox"/>                                                 | 0. <input type="checkbox"/> | 2. <input type="checkbox"/> | 1. <input type="checkbox"/>                           | 0. <input type="checkbox"/> | 2. <input type="checkbox"/> |
| 5. Consejería en lactancia materna                   | 1. <input type="checkbox"/>                                                 | 0. <input type="checkbox"/> | 2. <input type="checkbox"/> | 1. <input type="checkbox"/>                           | 0. <input type="checkbox"/> | 2. <input type="checkbox"/> |
| 6. Suplemento con hierro                             | 1. <input type="checkbox"/>                                                 | 0. <input type="checkbox"/> | 2. <input type="checkbox"/> | 1. <input type="checkbox"/>                           | 0. <input type="checkbox"/> | 2. <input type="checkbox"/> |
| 7. Actividades de educación en puericultura          | 1. <input type="checkbox"/>                                                 | 0. <input type="checkbox"/> | 2. <input type="checkbox"/> | 1. <input type="checkbox"/>                           | 0. <input type="checkbox"/> | 2. <input type="checkbox"/> |
| 8. Vacunación                                        | 1. <input type="checkbox"/>                                                 | 0. <input type="checkbox"/> | 2. <input type="checkbox"/> | 1. <input type="checkbox"/>                           | 0. <input type="checkbox"/> | 2. <input type="checkbox"/> |

Nombre de la EPS del caso seleccionado para consulta de servicios \_\_\_\_\_

3) Servicios preventivos 1 a 5 años de vida:

¿En este hogar hay niños entre 1 y 5 años? SI ☐ ¿Cuántos?   NO ☐

| ¿Cuáles de los siguientes servicios su EPS le ha ofrecido en el último año? | SELECCIONE UNO DE LOS CASOS EN EL HOGAR DE ESTE GRUPO DE EDAD |
|-----------------------------------------------------------------------------|---------------------------------------------------------------|
| <input type="checkbox"/>                                                    | <input type="checkbox"/>                                      |

|                                                          |                             |                             |                             | ¿Cuáles de dichos servicios el caso seleccionado ha consultado o ha recibido en el último año? |                             |                             |
|----------------------------------------------------------|-----------------------------|-----------------------------|-----------------------------|------------------------------------------------------------------------------------------------|-----------------------------|-----------------------------|
| Tipo de servicio                                         | Si                          | No                          | NS/NR                       | Si                                                                                             | No                          | NS/NR                       |
| 1. Controles de niño sano                                | 1. <input type="checkbox"/> | 0. <input type="checkbox"/> | 2. <input type="checkbox"/> | 1. <input type="checkbox"/>                                                                    | 0. <input type="checkbox"/> | 2. <input type="checkbox"/> |
| 2. Actividades de educación en el cuidado (puericultura) | 1. <input type="checkbox"/> | 0. <input type="checkbox"/> | 2. <input type="checkbox"/> | 1. <input type="checkbox"/>                                                                    | 0. <input type="checkbox"/> | 2. <input type="checkbox"/> |
| 3. Valoración visual                                     | 1. <input type="checkbox"/> | 0. <input type="checkbox"/> | 2. <input type="checkbox"/> | 1. <input type="checkbox"/>                                                                    | 0. <input type="checkbox"/> | 2. <input type="checkbox"/> |
| 4. Actividades de salud oral (sellantes)                 | 1. <input type="checkbox"/> | 0. <input type="checkbox"/> | 2. <input type="checkbox"/> | 1. <input type="checkbox"/>                                                                    | 0. <input type="checkbox"/> | 2. <input type="checkbox"/> |
| 5. Valoración auditiva                                   | 1. <input type="checkbox"/> | 0. <input type="checkbox"/> | 2. <input type="checkbox"/> | 1. <input type="checkbox"/>                                                                    | 0. <input type="checkbox"/> | 2. <input type="checkbox"/> |
| 6. Suplemento con hierro                                 | 1. <input type="checkbox"/> | 0. <input type="checkbox"/> | 2. <input type="checkbox"/> | 1. <input type="checkbox"/>                                                                    | 0. <input type="checkbox"/> | 2. <input type="checkbox"/> |
| 7. Suministro de antiparasitarios                        | 1. <input type="checkbox"/> | 0. <input type="checkbox"/> | 2. <input type="checkbox"/> | 1. <input type="checkbox"/>                                                                    | 0. <input type="checkbox"/> | 2. <input type="checkbox"/> |
| 8. Vacunación                                            | 1. <input type="checkbox"/> | 0. <input type="checkbox"/> | 2. <input type="checkbox"/> | 1. <input type="checkbox"/>                                                                    | 0. <input type="checkbox"/> | 2. <input type="checkbox"/> |

Nombre de la EPS del caso seleccionado para consulta de servicios \_\_\_\_\_

4) Servicios preventivos 6 a 10 años de vida:

¿En este hogar hay niños entre 6 a 10 años? SI ☐ ¿Cuántos?   NO ☐

|                                                          | ¿Cuáles de los siguientes servicios la EPS del caso seleccionado le ha ofrecido en el último año? |                             |                             | SELECCIONE UNO DE LOS CASOS EN EL HOGAR DE ESTE GRUPO DE EDAD<br><br>¿Cuáles de dichos servicios el caso seleccionado ha consultado o ha recibido en el último año? |                             |                             |
|----------------------------------------------------------|---------------------------------------------------------------------------------------------------|-----------------------------|-----------------------------|---------------------------------------------------------------------------------------------------------------------------------------------------------------------|-----------------------------|-----------------------------|
| Tipo de servicio                                         | Si                                                                                                | No                          | NS/NR                       | Si                                                                                                                                                                  | No                          | NS/NR                       |
| 1. Controles de niño sano                                | 1. <input type="checkbox"/>                                                                       | 0. <input type="checkbox"/> | 2. <input type="checkbox"/> | 1. <input type="checkbox"/>                                                                                                                                         | 0. <input type="checkbox"/> | 2. <input type="checkbox"/> |
| 2. Actividades de educación en el cuidado (puericultura) | 1. <input type="checkbox"/>                                                                       | 0. <input type="checkbox"/> | 2. <input type="checkbox"/> | 1. <input type="checkbox"/>                                                                                                                                         | 0. <input type="checkbox"/> | 2. <input type="checkbox"/> |
| 3. Valoración visual                                     | 1. <input type="checkbox"/>                                                                       | 0. <input type="checkbox"/> | 2. <input type="checkbox"/> | 1. <input type="checkbox"/>                                                                                                                                         | 0. <input type="checkbox"/> | 2. <input type="checkbox"/> |
| 4. Actividades en salud oral (fluorización y sellantes)  | 1. <input type="checkbox"/>                                                                       | 0. <input type="checkbox"/> | 2. <input type="checkbox"/> | 1. <input type="checkbox"/>                                                                                                                                         | 0. <input type="checkbox"/> | 2. <input type="checkbox"/> |
| 5. Suministro de antiparasitarios                        | 1. <input type="checkbox"/>                                                                       | 0. <input type="checkbox"/> | 2. <input type="checkbox"/> | 1. <input type="checkbox"/>                                                                                                                                         | 0. <input type="checkbox"/> | 2. <input type="checkbox"/> |
| 6. Vacunación                                            | 1. <input type="checkbox"/>                                                                       | 0. <input type="checkbox"/> | 2. <input type="checkbox"/> | 1. <input type="checkbox"/>                                                                                                                                         | 0. <input type="checkbox"/> | 2. <input type="checkbox"/> |

Nombre de la EPS del caso seleccionado para consulta de servicios \_\_\_\_\_

5) Servicios preventivos 11 a 19 años de vida:

¿En este hogar hay mujeres jóvenes entre 11 y 19 años? SI ☐ ¿Cuántos?   NO ☐

¿En este hogar hay hombres jóvenes entre 11 y 19 años? SI ☐ ¿Cuántos?   NO ☐

|                               | ¿Cuáles de los siguientes servicios su EPS le ha ofrecido en el último año? |                             |                             | SELECCIONE UNO DE LOS CASOS DE UNA MUJER JOVEN EN EL HOGAR<br><br>¿Cuáles de dichos servicios el caso seleccionado ha consultado o ha recibido en el último año? |                             |                             |
|-------------------------------|-----------------------------------------------------------------------------|-----------------------------|-----------------------------|------------------------------------------------------------------------------------------------------------------------------------------------------------------|-----------------------------|-----------------------------|
| Tipo de servicio              | Si                                                                          | No                          | NS/NR                       | Si                                                                                                                                                               | No                          | NS/NR                       |
| 1. Consulta médica preventiva | 1. <input type="checkbox"/>                                                 | 0. <input type="checkbox"/> | 2. <input type="checkbox"/> | 1. <input type="checkbox"/>                                                                                                                                      | 0. <input type="checkbox"/> | 2. <input type="checkbox"/> |

|                                                                                                      |                             |                             |                             |                             |                             |                             |
|------------------------------------------------------------------------------------------------------|-----------------------------|-----------------------------|-----------------------------|-----------------------------|-----------------------------|-----------------------------|
| 2. Consejería (planificación familiar, uso de drogas, alcohol, tabaco)                               | 1. <input type="checkbox"/> | 0. <input type="checkbox"/> | 2. <input type="checkbox"/> | 1. <input type="checkbox"/> | 0. <input type="checkbox"/> | 2. <input type="checkbox"/> |
| 3. Asesoría pre-concepcional                                                                         | 1. <input type="checkbox"/> | 0. <input type="checkbox"/> | 2. <input type="checkbox"/> | 1. <input type="checkbox"/> | 0. <input type="checkbox"/> | 2. <input type="checkbox"/> |
| 4. Consulta médica o psicológica por algún trastorno de la alimentación (anorexia, bulimia)          | 1. <input type="checkbox"/> | 0. <input type="checkbox"/> | 2. <input type="checkbox"/> | 1. <input type="checkbox"/> | 0. <input type="checkbox"/> | 2. <input type="checkbox"/> |
| 5. Consulta médica o psicológica por algún trastorno como: depresión, ansiedad, intento de suicidio. | 1. <input type="checkbox"/> | 0. <input type="checkbox"/> | 2. <input type="checkbox"/> | 1. <input type="checkbox"/> | 0. <input type="checkbox"/> | 2. <input type="checkbox"/> |
| 6. Valoración por agudeza visual                                                                     | 1. <input type="checkbox"/> | 0. <input type="checkbox"/> | 2. <input type="checkbox"/> | 1. <input type="checkbox"/> | 0. <input type="checkbox"/> | 2. <input type="checkbox"/> |
| 7. Consulta por salud oral (limpieza)                                                                | 1. <input type="checkbox"/> | 0. <input type="checkbox"/> | 2. <input type="checkbox"/> | 1. <input type="checkbox"/> | 0. <input type="checkbox"/> | 2. <input type="checkbox"/> |
| 8. Toma de presión arterial                                                                          | 1. <input type="checkbox"/> | 0. <input type="checkbox"/> | 2. <input type="checkbox"/> | 1. <input type="checkbox"/> | 0. <input type="checkbox"/> | 2. <input type="checkbox"/> |
| 9. Toma de glicemia                                                                                  | 1. <input type="checkbox"/> | 0. <input type="checkbox"/> | 2. <input type="checkbox"/> | 1. <input type="checkbox"/> | 0. <input type="checkbox"/> | 2. <input type="checkbox"/> |
| 10. Citología cervico vaginal                                                                        | 1. <input type="checkbox"/> | 0. <input type="checkbox"/> | 2. <input type="checkbox"/> | 1. <input type="checkbox"/> | 0. <input type="checkbox"/> | 2. <input type="checkbox"/> |

Nombre de la EPS del caso seleccionado para consulta de servicios \_\_\_\_\_

El caso seleccionado para consulta de servicios corresponde al **JEFE/A** DEL HOGAR o ADULTO INFORMANTE SI ☐ NO ☐

| Tipo de servicio                                                                                     | ¿Cuáles de los siguientes servicios su EPS le ha ofrecido en el último año? |                             |                             | SELECCIONE UNO DE LOS CASOS DE UN HOMBRE JOVEN EN EL HOGAR<br>¿Cuáles de dichos servicios el caso seleccionado ha consultado o ha recibido en el último año? |                             |                             |
|------------------------------------------------------------------------------------------------------|-----------------------------------------------------------------------------|-----------------------------|-----------------------------|--------------------------------------------------------------------------------------------------------------------------------------------------------------|-----------------------------|-----------------------------|
|                                                                                                      | Si                                                                          | No                          | NS/NR                       | Si                                                                                                                                                           | No                          | NS/NR                       |
| 1. Consulta médica preventiva                                                                        | 1. <input type="checkbox"/>                                                 | 0. <input type="checkbox"/> | 2. <input type="checkbox"/> | 1. <input type="checkbox"/>                                                                                                                                  | 0. <input type="checkbox"/> | 2. <input type="checkbox"/> |
| 2. Consejería (planificación familiar, uso de drogas, alcohol, tabaco)                               | 1. <input type="checkbox"/>                                                 | 0. <input type="checkbox"/> | 2. <input type="checkbox"/> | 1. <input type="checkbox"/>                                                                                                                                  | 0. <input type="checkbox"/> | 2. <input type="checkbox"/> |
| 3. Asesoría pre-concepcional                                                                         | 1. <input type="checkbox"/>                                                 | 0. <input type="checkbox"/> | 2. <input type="checkbox"/> | 1. <input type="checkbox"/>                                                                                                                                  | 0. <input type="checkbox"/> | 2. <input type="checkbox"/> |
| 4. Consulta médica o psicológica por algún trastorno de la alimentación (anorexia, bulimia)          | 1. <input type="checkbox"/>                                                 | 0. <input type="checkbox"/> | 2. <input type="checkbox"/> | 1. <input type="checkbox"/>                                                                                                                                  | 0. <input type="checkbox"/> | 2. <input type="checkbox"/> |
| 5. Consulta médica o psicológica por algún trastorno como: depresión, ansiedad, intento de suicidio. | 1. <input type="checkbox"/>                                                 | 0. <input type="checkbox"/> | 2. <input type="checkbox"/> | 1. <input type="checkbox"/>                                                                                                                                  | 0. <input type="checkbox"/> | 2. <input type="checkbox"/> |
| 6. Valoración por agudeza visual                                                                     | 1. <input type="checkbox"/>                                                 | 0. <input type="checkbox"/> | 2. <input type="checkbox"/> | 1. <input type="checkbox"/>                                                                                                                                  | 0. <input type="checkbox"/> | 2. <input type="checkbox"/> |
| 7. Consulta por salud oral (limpieza)                                                                | 1. <input type="checkbox"/>                                                 | 0. <input type="checkbox"/> | 2. <input type="checkbox"/> | 1. <input type="checkbox"/>                                                                                                                                  | 0. <input type="checkbox"/> | 2. <input type="checkbox"/> |
| 8. Toma de presión arterial                                                                          | 1. <input type="checkbox"/>                                                 | 0. <input type="checkbox"/> | 2. <input type="checkbox"/> | 1. <input type="checkbox"/>                                                                                                                                  | 0. <input type="checkbox"/> | 2. <input type="checkbox"/> |
| 9. Toma de glicemia                                                                                  | 1. <input type="checkbox"/>                                                 | 0. <input type="checkbox"/> | 2. <input type="checkbox"/> | 1. <input type="checkbox"/>                                                                                                                                  | 0. <input type="checkbox"/> | 2. <input type="checkbox"/> |

Nombre de la EPS del caso seleccionado para consulta de servicios \_\_\_\_\_

El caso seleccionado para consulta de servicios corresponde al **JEFE/A** DEL HOGAR o ADULTO INFORMANTE SI ☐ NO ☐

6) Servicios preventivos 20 a 29 años de vida:

¿En este hogar hay mujeres entre 20 y 29 años? SI ☐ ¿Cuántos?  NO ☐

¿En este hogar hay hombres entre 20 y 29 años? SI ☐ ¿Cuántos?  NO ☐

|                                                | ¿Cuáles de los siguientes servicios su EPS le ha ofrecido en el último año? |                             |                             | SELECCIONE UNO DE LOS CASOS DE UNA MUJER EN EL HOGAR<br>¿Cuáles de dichos servicios el caso seleccionado ha consultado o ha recibido en el último año? |                             |                             |
|------------------------------------------------|-----------------------------------------------------------------------------|-----------------------------|-----------------------------|--------------------------------------------------------------------------------------------------------------------------------------------------------|-----------------------------|-----------------------------|
| Tipo de servicio                               | Si                                                                          | No                          | NS/NR                       | Si                                                                                                                                                     | No                          | NS/NR                       |
| 1. Citología cervico vaginal                   | 1. <input type="checkbox"/>                                                 | 0. <input type="checkbox"/> | 2. <input type="checkbox"/> | 1. <input type="checkbox"/>                                                                                                                            | 0. <input type="checkbox"/> | 2. <input type="checkbox"/> |
| 2. Examen de seno y educación para auto examen | 1. <input type="checkbox"/>                                                 | 0. <input type="checkbox"/> | 2. <input type="checkbox"/> | 1. <input type="checkbox"/>                                                                                                                            | 0. <input type="checkbox"/> | 2. <input type="checkbox"/> |
| 3. Consulta médica preventiva                  | 1. <input type="checkbox"/>                                                 | 0. <input type="checkbox"/> | 2. <input type="checkbox"/> | 1. <input type="checkbox"/>                                                                                                                            | 0. <input type="checkbox"/> | 2. <input type="checkbox"/> |
| 4. Toma de tensión arterial                    | 1. <input type="checkbox"/>                                                 | 0. <input type="checkbox"/> | 2. <input type="checkbox"/> | 1. <input type="checkbox"/>                                                                                                                            | 0. <input type="checkbox"/> | 2. <input type="checkbox"/> |
| 5. Prueba ELISA para VIH                       | 1. <input type="checkbox"/>                                                 | 0. <input type="checkbox"/> | 2. <input type="checkbox"/> | 1. <input type="checkbox"/>                                                                                                                            | 0. <input type="checkbox"/> | 2. <input type="checkbox"/> |
| 6. Prueba VDRL para sífilis                    | 1. <input type="checkbox"/>                                                 | 0. <input type="checkbox"/> | 2. <input type="checkbox"/> | 1. <input type="checkbox"/>                                                                                                                            | 0. <input type="checkbox"/> | 2. <input type="checkbox"/> |

Nombre de la EPS del caso seleccionado para consulta de servicios \_\_\_\_\_

El caso seleccionado para consulta de servicios corresponde al **JEFE/A** DEL HOGAR o ADULTO INFORMANTE SI ☐ NO ☐

|                               | ¿Cuáles de los siguientes servicios su EPS le ha ofrecido en el último año? |                             |                             | SELECCIONE UNO DE LOS CASOS DE UN HOMBRE EN EL HOGAR<br>¿Cuáles de dichos servicios el caso seleccionado ha consultado o ha recibido en el último año? |                             |                             |
|-------------------------------|-----------------------------------------------------------------------------|-----------------------------|-----------------------------|--------------------------------------------------------------------------------------------------------------------------------------------------------|-----------------------------|-----------------------------|
| Tipo de servicio              | Si                                                                          | No                          | NS/NR                       | Si                                                                                                                                                     | No                          | NS/NR                       |
| 1. Consulta médica preventiva | 1. <input type="checkbox"/>                                                 | 0. <input type="checkbox"/> | 2. <input type="checkbox"/> | 1. <input type="checkbox"/>                                                                                                                            | 0. <input type="checkbox"/> | 2. <input type="checkbox"/> |
| 2. Toma de tensión arterial   | 1. <input type="checkbox"/>                                                 | 0. <input type="checkbox"/> | 2. <input type="checkbox"/> | 1. <input type="checkbox"/>                                                                                                                            | 0. <input type="checkbox"/> | 2. <input type="checkbox"/> |
| 3. Prueba ELISA para VIH      | 1. <input type="checkbox"/>                                                 | 0. <input type="checkbox"/> | 2. <input type="checkbox"/> | 1. <input type="checkbox"/>                                                                                                                            | 0. <input type="checkbox"/> | 2. <input type="checkbox"/> |
| 4. Prueba VDRL para sífilis   | 1. <input type="checkbox"/>                                                 | 0. <input type="checkbox"/> | 2. <input type="checkbox"/> | 1. <input type="checkbox"/>                                                                                                                            | 0. <input type="checkbox"/> | 2. <input type="checkbox"/> |

Nombre de la EPS del caso seleccionado para consulta de servicios \_\_\_\_\_

El caso seleccionado para consulta de servicios corresponde al **JEFE/A** DEL HOGAR o ADULTO INFORMANTE SI ☐ NO ☐

7) Servicios preventivos 30 a 44 años de vida:

¿En este hogar hay mujeres entre 30 y 44 años? SI ☐ ¿Cuántos?  NO ☐

¿En este hogar hay hombres entre 30 y 44 años? SI ☐ ¿Cuántos?  NO ☐

|                              | ¿Cuáles de los siguientes servicios su EPS le ha ofrecido en el último año? |                             |                             | SELECCIONE UNO DE LOS CASOS DE UNA MUJER EN EL HOGAR<br>¿Cuáles de dichos servicios el caso seleccionado ha consultado o ha recibido en el último año? |                             |                             |
|------------------------------|-----------------------------------------------------------------------------|-----------------------------|-----------------------------|--------------------------------------------------------------------------------------------------------------------------------------------------------|-----------------------------|-----------------------------|
| Tipo de servicio             | Si                                                                          | No                          | NS/NR                       | Si                                                                                                                                                     | No                          | NS/NR                       |
| 1. Citología cervico vaginal | 1. <input type="checkbox"/>                                                 | 0. <input type="checkbox"/> | 2. <input type="checkbox"/> | 1. <input type="checkbox"/>                                                                                                                            | 0. <input type="checkbox"/> | 2. <input type="checkbox"/> |
| 2. Autoexamen de mama        | 1. <input type="checkbox"/>                                                 | 0. <input type="checkbox"/> | 2. <input type="checkbox"/> | 1. <input type="checkbox"/>                                                                                                                            | 0. <input type="checkbox"/> | 2. <input type="checkbox"/> |
| 3. Consulta médica           | 1. <input type="checkbox"/>                                                 | 0. <input type="checkbox"/> | 2. <input type="checkbox"/> | 1. <input type="checkbox"/>                                                                                                                            | 0. <input type="checkbox"/> | 2. <input type="checkbox"/> |
| 4. Toma de tensión arterial  | 1. <input type="checkbox"/>                                                 | 0. <input type="checkbox"/> | 2. <input type="checkbox"/> | 1. <input type="checkbox"/>                                                                                                                            | 0. <input type="checkbox"/> | 2. <input type="checkbox"/> |

|                          |                             |                             |                             |                             |                             |                             |
|--------------------------|-----------------------------|-----------------------------|-----------------------------|-----------------------------|-----------------------------|-----------------------------|
| 5. Toma colesterol total | 1. <input type="checkbox"/> | 0. <input type="checkbox"/> | 2. <input type="checkbox"/> | 1. <input type="checkbox"/> | 0. <input type="checkbox"/> | 2. <input type="checkbox"/> |
| 6. Toma glicemia         | 1. <input type="checkbox"/> | 0. <input type="checkbox"/> | 2. <input type="checkbox"/> | 1. <input type="checkbox"/> | 0. <input type="checkbox"/> | 2. <input type="checkbox"/> |
| 7. Tacto rectal          | 1. <input type="checkbox"/> | 0. <input type="checkbox"/> | 2. <input type="checkbox"/> | 1. <input type="checkbox"/> | 0. <input type="checkbox"/> | 2. <input type="checkbox"/> |
| 8. Antígeno prostático   | 1. <input type="checkbox"/> | 0. <input type="checkbox"/> | 2. <input type="checkbox"/> | 1. <input type="checkbox"/> | 0. <input type="checkbox"/> | 2. <input type="checkbox"/> |

Nombre de la EPS del caso seleccionado para consulta de servicios \_\_\_\_\_

El caso seleccionado para consulta de servicios corresponde al **JEFE/A** DEL HOGAR o ADULTO INFORMANTE SI ☐ NO ☐

| Tipo de servicio            | ¿Cuáles de los siguientes servicios su EPS le ha ofrecido en el último año? |                             |                             | SELECCIONE UNO DE LOS CASOS DE UN HOMBRE EN EL HOGAR<br>¿Cuáles de dichos servicios el caso seleccionado ha consultado o ha recibido en el último año? |                             |                             |
|-----------------------------|-----------------------------------------------------------------------------|-----------------------------|-----------------------------|--------------------------------------------------------------------------------------------------------------------------------------------------------|-----------------------------|-----------------------------|
|                             | Si                                                                          | No                          | NS/NR                       | Si                                                                                                                                                     | No                          | NS/NR                       |
| 1. Consulta médica          | 1. <input type="checkbox"/>                                                 | 0. <input type="checkbox"/> | 2. <input type="checkbox"/> | 1. <input type="checkbox"/>                                                                                                                            | 0. <input type="checkbox"/> | 2. <input type="checkbox"/> |
| 2. Toma de tensión arterial | 1. <input type="checkbox"/>                                                 | 0. <input type="checkbox"/> | 2. <input type="checkbox"/> | 1. <input type="checkbox"/>                                                                                                                            | 0. <input type="checkbox"/> | 2. <input type="checkbox"/> |
| 3. Toma colesterol total    | 1. <input type="checkbox"/>                                                 | 0. <input type="checkbox"/> | 2. <input type="checkbox"/> | 1. <input type="checkbox"/>                                                                                                                            | 0. <input type="checkbox"/> | 2. <input type="checkbox"/> |
| 4. Toma glicemia            | 1. <input type="checkbox"/>                                                 | 0. <input type="checkbox"/> | 2. <input type="checkbox"/> | 1. <input type="checkbox"/>                                                                                                                            | 0. <input type="checkbox"/> | 2. <input type="checkbox"/> |
| 5. Tacto rectal             | 1. <input type="checkbox"/>                                                 | 0. <input type="checkbox"/> | 2. <input type="checkbox"/> | 1. <input type="checkbox"/>                                                                                                                            | 0. <input type="checkbox"/> | 2. <input type="checkbox"/> |
| 6. Antígeno prostático      | 1. <input type="checkbox"/>                                                 | 0. <input type="checkbox"/> | 2. <input type="checkbox"/> | 1. <input type="checkbox"/>                                                                                                                            | 0. <input type="checkbox"/> | 2. <input type="checkbox"/> |

Nombre de la EPS del caso seleccionado para consulta de servicios \_\_\_\_\_

El caso seleccionado para consulta de servicios corresponde al **JEFE/A** DEL HOGAR o ADULTO INFORMANTE SI ☐ NO ☐

#### 8) Servicios preventivos Mayores de 45 años:

¿En este hogar hay mujeres mayores de 45 años? SI ☐ ¿Cuántos?  NO ☐

¿En este hogar hay hombres mayores de 45 años? SI ☐ ¿Cuántos?  NO ☐

| Tipo de servicio                                                                                                                 | ¿Cuáles de los siguientes servicios su EPS le ha ofrecido en el último año? |                             |                             | SELECCIONE UNO DE LOS CASOS DE UNA MUJER EN EL HOGAR<br>¿Cuáles de dichos servicios el caso seleccionado ha consultado o ha recibido en el último año? |                             |                             |
|----------------------------------------------------------------------------------------------------------------------------------|-----------------------------------------------------------------------------|-----------------------------|-----------------------------|--------------------------------------------------------------------------------------------------------------------------------------------------------|-----------------------------|-----------------------------|
|                                                                                                                                  | Si                                                                          | No                          | NS/NR                       | Si                                                                                                                                                     | No                          | NS/NR                       |
| 1. Consulta médica del quinquenio (cada 5 años, donde se dan recomendaciones de hábitos como: ejercicio, alimentación adecuadas) | 1. <input type="checkbox"/>                                                 | 0. <input type="checkbox"/> | 2. <input type="checkbox"/> | 1. <input type="checkbox"/>                                                                                                                            | 0. <input type="checkbox"/> | 2. <input type="checkbox"/> |
| 2. Mamografía                                                                                                                    | 1. <input type="checkbox"/>                                                 | 0. <input type="checkbox"/> | 2. <input type="checkbox"/> | 1. <input type="checkbox"/>                                                                                                                            | 0. <input type="checkbox"/> | 2. <input type="checkbox"/> |
| 3. Citología cervico vaginal                                                                                                     | 1. <input type="checkbox"/>                                                 | 0. <input type="checkbox"/> | 2. <input type="checkbox"/> | 1. <input type="checkbox"/>                                                                                                                            | 0. <input type="checkbox"/> | 2. <input type="checkbox"/> |
| 4. Sangre oculta en heces                                                                                                        | 1. <input type="checkbox"/>                                                 | 0. <input type="checkbox"/> | 2. <input type="checkbox"/> | 1. <input type="checkbox"/>                                                                                                                            | 0. <input type="checkbox"/> | 2. <input type="checkbox"/> |
| 5. Colonoscopia                                                                                                                  | 1. <input type="checkbox"/>                                                 | 0. <input type="checkbox"/> | 2. <input type="checkbox"/> | 1. <input type="checkbox"/>                                                                                                                            | 0. <input type="checkbox"/> | 2. <input type="checkbox"/> |
| 6. Densitometría ósea                                                                                                            | 1. <input type="checkbox"/>                                                 | 0. <input type="checkbox"/> | 2. <input type="checkbox"/> | 1. <input type="checkbox"/>                                                                                                                            | 0. <input type="checkbox"/> | 2. <input type="checkbox"/> |
| 7. Colesterol total y colesterol HDL                                                                                             | 1. <input type="checkbox"/>                                                 | 0. <input type="checkbox"/> | 2. <input type="checkbox"/> | 1. <input type="checkbox"/>                                                                                                                            | 0. <input type="checkbox"/> | 2. <input type="checkbox"/> |
| 8. Uroanálisis                                                                                                                   | 1. <input type="checkbox"/>                                                 | 0. <input type="checkbox"/> | 2. <input type="checkbox"/> | 1. <input type="checkbox"/>                                                                                                                            | 0. <input type="checkbox"/> | 2. <input type="checkbox"/> |

|                              |                             |                             |                             |                             |                             |                             |
|------------------------------|-----------------------------|-----------------------------|-----------------------------|-----------------------------|-----------------------------|-----------------------------|
| 9. Triglicéridos             | 1. <input type="checkbox"/> | 0. <input type="checkbox"/> | 2. <input type="checkbox"/> | 1. <input type="checkbox"/> | 0. <input type="checkbox"/> | 2. <input type="checkbox"/> |
| 10. Creatinina               | 1. <input type="checkbox"/> | 0. <input type="checkbox"/> | 2. <input type="checkbox"/> | 1. <input type="checkbox"/> | 0. <input type="checkbox"/> | 2. <input type="checkbox"/> |
| 11. Glicemia                 | 1. <input type="checkbox"/> | 0. <input type="checkbox"/> | 2. <input type="checkbox"/> | 1. <input type="checkbox"/> | 0. <input type="checkbox"/> | 2. <input type="checkbox"/> |
| 12. Toma de presión arterial | 1. <input type="checkbox"/> | 0. <input type="checkbox"/> | 2. <input type="checkbox"/> | 1. <input type="checkbox"/> | 0. <input type="checkbox"/> | 2. <input type="checkbox"/> |

Nombre de la EPS del caso seleccionado para consulta de servicios \_\_\_\_\_

El caso seleccionado para consulta de servicios corresponde al **JEFE/A** DEL HOGAR o ADULTO INFORMANTE SI ☐ NO ☐

| Tipo de servicio                                                                                                                 | ¿Cuáles de los siguientes servicios su EPS le ha ofrecido en el último año? |                             |                             | SELECCIONE UNO DE LOS CASOS DE UN HOMBRE EN EL HOGAR<br>¿Cuáles de dichos servicios el caso seleccionado ha consultado o ha recibido en el último año? |                             |                             |
|----------------------------------------------------------------------------------------------------------------------------------|-----------------------------------------------------------------------------|-----------------------------|-----------------------------|--------------------------------------------------------------------------------------------------------------------------------------------------------|-----------------------------|-----------------------------|
|                                                                                                                                  | Si                                                                          | No                          | NS/NR                       | Si                                                                                                                                                     | No                          | NS/NR                       |
| 1. Consulta médica del quinquenio (cada 5 años, donde se dan recomendaciones de hábitos como: ejercicio, alimentación adecuadas) | 1. <input type="checkbox"/>                                                 | 0. <input type="checkbox"/> | 2. <input type="checkbox"/> | 1. <input type="checkbox"/>                                                                                                                            | 0. <input type="checkbox"/> | 2. <input type="checkbox"/> |
| 2. Sangre oculta en heces                                                                                                        | 1. <input type="checkbox"/>                                                 | 0. <input type="checkbox"/> | 2. <input type="checkbox"/> | 1. <input type="checkbox"/>                                                                                                                            | 0. <input type="checkbox"/> | 2. <input type="checkbox"/> |
| 3. Colonoscopia                                                                                                                  | 1. <input type="checkbox"/>                                                 | 0. <input type="checkbox"/> | 2. <input type="checkbox"/> | 1. <input type="checkbox"/>                                                                                                                            | 0. <input type="checkbox"/> | 2. <input type="checkbox"/> |
| 4. Tacto rectal                                                                                                                  | 1. <input type="checkbox"/>                                                 | 0. <input type="checkbox"/> | 2. <input type="checkbox"/> | 1. <input type="checkbox"/>                                                                                                                            | 0. <input type="checkbox"/> | 2. <input type="checkbox"/> |
| 5. Antígeno prostático                                                                                                           | 1. <input type="checkbox"/>                                                 | 0. <input type="checkbox"/> | 2. <input type="checkbox"/> | 1. <input type="checkbox"/>                                                                                                                            | 0. <input type="checkbox"/> | 2. <input type="checkbox"/> |
| 6. Densitometría ósea                                                                                                            | 1. <input type="checkbox"/>                                                 | 0. <input type="checkbox"/> | 2. <input type="checkbox"/> | 1. <input type="checkbox"/>                                                                                                                            | 0. <input type="checkbox"/> | 2. <input type="checkbox"/> |
| 7. Colesterol total y colesterol HDL                                                                                             | 1. <input type="checkbox"/>                                                 | 0. <input type="checkbox"/> | 2. <input type="checkbox"/> | 1. <input type="checkbox"/>                                                                                                                            | 0. <input type="checkbox"/> | 2. <input type="checkbox"/> |
| 8. Uroanálisis                                                                                                                   | 1. <input type="checkbox"/>                                                 | 0. <input type="checkbox"/> | 2. <input type="checkbox"/> | 1. <input type="checkbox"/>                                                                                                                            | 0. <input type="checkbox"/> | 2. <input type="checkbox"/> |
| 9. Triglicéridos                                                                                                                 | 1. <input type="checkbox"/>                                                 | 0. <input type="checkbox"/> | 2. <input type="checkbox"/> | 1. <input type="checkbox"/>                                                                                                                            | 0. <input type="checkbox"/> | 2. <input type="checkbox"/> |
| 10. Creatinina                                                                                                                   | 1. <input type="checkbox"/>                                                 | 0. <input type="checkbox"/> | 2. <input type="checkbox"/> | 1. <input type="checkbox"/>                                                                                                                            | 0. <input type="checkbox"/> | 2. <input type="checkbox"/> |
| 11. Glicemia                                                                                                                     | 1. <input type="checkbox"/>                                                 | 0. <input type="checkbox"/> | 2. <input type="checkbox"/> | 1. <input type="checkbox"/>                                                                                                                            | 0. <input type="checkbox"/> | 2. <input type="checkbox"/> |
| 12. Toma de presión arterial                                                                                                     | 1. <input type="checkbox"/>                                                 | 0. <input type="checkbox"/> | 2. <input type="checkbox"/> | 1. <input type="checkbox"/>                                                                                                                            | 0. <input type="checkbox"/> | 2. <input type="checkbox"/> |

Nombre de la EPS del caso seleccionado para consulta de servicios \_\_\_\_\_

El caso seleccionado para consulta de servicios corresponde al **JEFE/A** DEL HOGAR o ADULTO INFORMANTE SI ☐ NO ☐

9) Servicios preventivos durante el Embarazo:

¿En este hogar hay mujeres embarazadas? SI ☐ ¿Cuántas? ☐ ☐ NO ☐

| Tipo de servicio                  | ¿Cuáles de los siguientes servicios su EPS le ha ofrecido en el último año? |                             |                             | SELECCIONE UNO DE LOS CASOS DE UNA MUJER EMBARAZADA EN EL HOGAR<br>¿Cuáles de dichos servicios el caso seleccionado ha consultado o ha recibido en el último año? |                             |                             |
|-----------------------------------|-----------------------------------------------------------------------------|-----------------------------|-----------------------------|-------------------------------------------------------------------------------------------------------------------------------------------------------------------|-----------------------------|-----------------------------|
|                                   | Si                                                                          | No                          | NS/NR                       | Si                                                                                                                                                                | No                          | NS/NR                       |
| 1. Consulta médica de primera vez | 1. <input type="checkbox"/>                                                 | 0. <input type="checkbox"/> | 2. <input type="checkbox"/> | 1. <input type="checkbox"/>                                                                                                                                       | 0. <input type="checkbox"/> | 2. <input type="checkbox"/> |
| 2. Controles prenatales           | 1. <input type="checkbox"/>                                                 | 0. <input type="checkbox"/> | 2. <input type="checkbox"/> | 1. <input type="checkbox"/>                                                                                                                                       | 0. <input type="checkbox"/> | 2. <input type="checkbox"/> |
| 3. Pruebas de hemoclasificación   | 1. <input type="checkbox"/>                                                 | 0. <input type="checkbox"/> | 2. <input type="checkbox"/> | 1. <input type="checkbox"/>                                                                                                                                       | 0. <input type="checkbox"/> | 2. <input type="checkbox"/> |
| 4. Exámenes de Laboratorio        | 1. <input type="checkbox"/>                                                 | 0. <input type="checkbox"/> | 2. <input type="checkbox"/> | 1. <input type="checkbox"/>                                                                                                                                       | 0. <input type="checkbox"/> | 2. <input type="checkbox"/> |



|               |                             |                             |                             |                             |                             |                             |
|---------------|-----------------------------|-----------------------------|-----------------------------|-----------------------------|-----------------------------|-----------------------------|
| 5. Ecografías | 1. <input type="checkbox"/> | 0. <input type="checkbox"/> | 2. <input type="checkbox"/> | 1. <input type="checkbox"/> | 0. <input type="checkbox"/> | 2. <input type="checkbox"/> |
| 6. Vacunación | 1. <input type="checkbox"/> | 0. <input type="checkbox"/> | 2. <input type="checkbox"/> | 1. <input type="checkbox"/> | 0. <input type="checkbox"/> | 2. <input type="checkbox"/> |

Nombre de la EPS del caso seleccionado para consulta de servicios \_\_\_\_\_

El caso seleccionado para consulta de servicios corresponde al **JEFE/A DEL HOGAR** o ADULTO INFORMANTE SI ☐ NO ☐

10) ¿En el desplazamiento para llegar al servicio de **ATENCIÓN BÁSICO EN SALUD**, usted o su familia utiliza más de un medio de transporte?

0. ☐ No

1. ☐ Sí

2. ☐ NS/NR

11) ¿Cuál(es) utiliza más frecuentemente? (**Puede marcar varias opciones**)

☐ A pie

☐ Bus

☐ Taxi

☐ Mototaxi

☐ Vehículo propio (Carro o Moto)

☐ Bicicleta

☐ Lancha

☐ Otro

12) ¿En cuánto tiempo llega al lugar de la atención en salud?

1. ☐ Menos de 1 hora

2. ☐ De 1 a 4 horas

3. ☐ De 5 a 8 horas

4. ☐ Más de 8 horas

#### Módulo 4: Acceso a Servicios Curativos o de Rehabilitación

1) En los últimos 6 meses, ¿usted o algún miembro de su familia tuvo que acudir al servicio de urgencias en una institución prestadora de servicios pública o privada?

1. ☐ Sí

0. ☐ No → **Pase a pregunta 7)**

2. ☐ NS/NR → **Pase a pregunta 7)**

2) ¿Cuánto tiempo transcurrió entre el momento de llegar al servicio de urgencias y la consulta médica?

1. ☐ Lo atendieron inmediatamente

2. ☐ En máximo 30 minutos

3. ☐ Entre 31 minutos y una hora

4. ☐ Entre una y dos horas

5. ☐ Más de dos horas

6. ☐ NS/NR

3) ¿Durante su estancia en el servicio de urgencias usted considera que le brindaron la atención necesaria para su problema de salud?

1. ☐ Sí → **Pase a pregunta 5)**

0. ☐ No

2. ☐ NS/NR

4) ¿Cuál fue la razón principal por la que no le brindaron asistencia en el servicio de urgencias? (**Luego pase a la pregunta 7)**

1. ☐ El caso era leve y fue remitido a consulta prioritaria

2. ☐ Esperó demasiado tiempo y no lo atendieron

3. ☐ Indicaron que allí no lo podían atender porque no estaba afiliado a alguna entidad que

tuviera contrato con ellos

4. ☐ No presentó identificación

5. ☐ No presentó el carne de afiliación

6. ☐ Indicaron que debía consultar a otra institución que tuviera los servicios requeridos para atenderlo

7. ☐ Otra. ¿Cuál? \_\_\_\_\_

8. ☐ NS/NR

5) En general considera que la calidad del servicio de urgencias fue:

1. ☐ Muy Buena

2. ☐ Buena

3. ☐ Mala

4. ☐ Muy mala

5. ☐ NS/NR

6) ¿Cuáles de las siguientes fuentes utilizó para cubrir los costos de atención en urgencias? (**Puede marcar varias opciones**)

☐ EPS contributivo

☐ EPS subsidiado

☐ EPS Régimen especial

☐ Seguro médico, plan complementario o medicina prepagada

☐ Servicio médico de la empresa

☐ Seguro obligatorio de accidentes de tránsito (SOAT)

☐ Secretaría de Salud o Alcaldía (Sisben o no afiliado)

☐ Recursos propios y/o familiares

☐ Otros. ¿Cuál? \_\_\_\_\_

7) ¿En los últimos 6 meses usted o algún miembro de su familia, cuando han tenido algún problema de salud, ha consultado a médico general?

1. ☐ Sí

0. ☐ No → **Pase a pregunta 23)**

2. ☐ No han tenido algún problema de salud → **Pase a pregunta 25)**

3. ☐ NS/NR → **Pase a pregunta 25)**

8) ¿Cuánto tiempo transcurrió entre el momento de pedir la cita y el momento de la consulta con el médico general?

1. ☐ No aplica porque no ha sido atendido

2. ☐ El mismo día

3. ☐ Menos de 1 semana

4. ☐ De 2 a 4 semanas

5. ☐ De 1 a 3 meses

6. ☐ De 4 a 6 meses

7. ☐ Más de 6 meses

9) ¿El médico general le brindó la atención necesaria para su problema de salud?

1. ☐ Sí

0. ☐ No

2. ☐ NS/NR

10) Luego de la consulta médica general tuvo alguno de los siguientes problemas para el tratamiento? (**Puede marcar varias opciones**)

☐ No tuvo problemas para el tratamiento

☐ La EPS no le autorizó medicamentos, exámenes o procedimientos

- ☐ Falta de dinero para pagar copagos de medicamentos, exámenes y procedimientos
- ☐ Trámites excesivos para gestionar medicamentos, exámenes o procedimientos no POS
- ☐ Falta de tiempo
- ☐ Otras. ¿Cuáles? \_\_\_\_\_

11) ¿Cuáles de las siguientes fuentes utilizó para cubrir los costos de la consulta médica general?

- ☐ EPS contributivo
- ☐ EPS subsidiado
- ☐ EPS Régimen especial
- ☐ Seguro médico, plan complementario o medicina prepagada
- ☐ Servicio médico de la empresa
- ☐ Seguro obligatorio de accidentes de tránsito (SOAT)
- ☐ Secretaría de Salud o Alcaldía (Sisben o no afiliado)
- ☐ Recursos propios y/o familiares
- ☐ Otros. ¿Cuál? \_\_\_\_\_

12) ¿Fue remitido a especialista por el médico general?

- 1. ☐ Sí
- 0. ☐ No → **Pase a pregunta 18)**
- 2. ☐ NS/NR → **Pase a pregunta 18)**

13) A qué especialista fue remitido:

- |                                                 |                                                        |
|-------------------------------------------------|--------------------------------------------------------|
| 1. <input type="checkbox"/> Pediatra            | 2. <input type="checkbox"/> Internista                 |
| 3. <input type="checkbox"/> Ginecólogo          | 4. <input type="checkbox"/> Oftalmología               |
| 5. <input type="checkbox"/> Cirugía             | 6. <input type="checkbox"/> Cardiólogo                 |
| 7. <input type="checkbox"/> Otorrinolaringólogo | 8. <input type="checkbox"/> Traumatólogo u Ortopedista |
| 9. <input type="checkbox"/> Neurólogo           | 10. <input type="checkbox"/> Otro ¿Cuál? _____         |

14) El especialista que lo atendió fue por:

- 1. ☐ EPS contributivo
- 2. ☐ EPS subsidiado
- 3. ☐ EPS Régimen especial
- 4. ☐ Seguro médico, plan complementario o medicina prepagada
- 5. ☐ Servicio médico de la empresa
- 6. ☐ Seguro obligatorio de accidentes de tránsito (SOAT)
- 7. ☐ Secretaría de Salud o Alcaldía (Sisben o no afiliado)
- 8. ☐ Particular (recursos propios)
- 9. ☐ No ha sido atendido

15) ¿Cuánto tiempo transcurrió entre el momento de la solicitud de la cita con especialista y la autorización a la EPS?

- 1. ☐ No aplica
- 2. ☐ El mismo día
- 3. ☐ Menos de 1 semana
- 4. ☐ De 2 a 4 semanas
- 5. ☐ Más de 1 mes

16) ¿Cuánto tiempo transcurrió entre la autorización a la EPS y la consulta con el especialista?

1. ☐ No aplica porque no ha sido atendido
2. ☐ El mismo día
3. ☐ Menos de 1 semana
4. ☐ De 2 a 4 semanas
5. ☐ De 1 a 3 meses
6. ☐ De 4 a 6 meses
7. ☐ Más de 6 meses

17) ¿El médico especialista le brindó la atención necesaria para su problema de salud?

1. ☐ Sí
0. ☐ No
2. ☐ NS/NR

18) Por la situación consultada, ¿le formularon medicamentos?

1. ☐ Sí
0. ☐ No → **Pase a pregunta 21)**
2. ☐ NS/NR → **Pase a pregunta 21)**

19) ¿Estos medicamentos le fueron entregados por cuenta de la institución a la cual está afiliado?

1. ☐ Sí, todos → **Pase a pregunta 21)**
2. ☐ Sí, algunos → **Pase a pregunta 21)**
0. ☐ No
3. ☐ NS/NR → **Pase a pregunta 21)**

20) ¿Por qué razón no le fueron entregados los medicamentos (algunos o ninguno)? (**Puede marcar varias opciones**).

- ☐ No están incluidos en el POS
- ☐ No había los medicamentos recetados
- ☐ No había la cantidad requerida
- ☐ Por errores o deficiencias en la expedición de la fórmula médica
- ☐ No hizo las gestiones para reclamarlos
- ☐ Acudió a medico particular
- ☐ Otra. ¿Cuál? \_\_\_\_\_

21) En general, considera que la calidad de la prestación del servicio de salud (medicina general o medicina especializada) fue:

1. ☐ Muy Buena → **Pase a pregunta 25)**
2. ☐ Buena → **Pase a pregunta 25)**
3. ☐ Mala
4. ☐ Muy mala
5. ☐ NS/NR

22) ¿Cuál es el aspecto que más influyó en su percepción sobre la calidad de la prestación del servicio? (**Puede marcar varias opciones**) (**Luego Pase a pregunta 25)**).

- ☐ Trámites excesivos y/o dispendiosos
- ☐ Mala atención del personal administrativo (vigilante, recepcionista, cajera, etc.)
- ☐ Mala atención del personal asistencial (médicos, enfermeras, etc.)
- ☐ Falta de capacidad, conocimientos o habilidad del personal asistencial o administrativo
- ☐ Condiciones deficientes de infraestructura, dotación y/o mobiliario

☐ Falta de oportunidad en la atención

☐ Otro. ¿Cuál? \_\_\_\_\_

23) ¿Cuál fue la razón principal por la que no consultó al médico general? (**Puede marcar varias opciones**)

☐ Muchos trámites para la cita

☐ El centro de atención queda lejos

☐ Falta de dinero para pagar el transporte y/o los copagos

☐ Mal servicio

☐ Cita distanciada en el tiempo

☐ Consultó antes y no le resolvieron el problema

☐ No confía en los médicos

☐ Falta de tiempo

☐ Otra. ¿Cuál? \_\_\_\_\_

24) Si no consultó, ¿de qué manera resolvió su situación de salud?

1. ☐ Acudió a un boticario, farmaceuta, droguista

2. ☐ Consultó a un tegua, empírico, curandero, yerbatero, comadrona

3. ☐ Asistió a terapias alternativas (acupuntura, esencias florales, musicoterapias, homeópata, etc.)

4. ☐ Usó remedios caseros

5. ☐ Se autorrecetó

6. ☐ Consultó a médico particular

7. ☐ No hizo nada

25) En los últimos 6 meses, ¿usted o algún miembro del hogar ha tenido alguna hospitalización?

1. ☐ Sí

0. ☐ No → **Pase a MODULO 5**

2. ☐ NS/NR → **Pase a MODULO 5**

26) La hospitalización fue:

1. ☐ Por urgencias

2. ☐ Programada → **Pase a pregunta 28)**

27) ¿Cuánto tiempo transcurrió en urgencias entre la orden de hospitalización y el traslado a la cama asignada?

1. ☐ Lo trasladaron inmediatamente

2. ☐ El mismo día

3. ☐ Entre 2 y 3 días

4. ☐ Más de 3 días

28) ¿Durante la hospitalización usted considera que le brindaron la atención necesaria para su problema de salud?

1. ☐ Sí

0. ☐ No

2. ☐ NS/NR

29) En general, considera que la calidad de la hospitalización fue:

1. ☐ Muy Buena

2. ☐ Buena

3. ☐ Mala

4. ☐ Muy mala

5. ☐ NS/NR

30) ¿Cuáles de las siguientes fuentes utilizó para cubrir los costos de la hospitalización? (**Puede marcar varias opciones**)

- ☐ EPS contributivo
- ☐ EPS subsidiado
- ☐ EPS Régimen especial
- ☐ Seguro médico, plan complementario o medicina prepagada
- ☐ Servicio médico de la empresa
- ☐ Seguro obligatorio de accidentes de tránsito (SOAT)
- ☐ Secretaría de Salud o Alcaldía (Sisben o no afiliado)
- ☐ Recursos propios y/o familiares
- ☐ Otros. ¿Cuál? \_\_\_\_\_

#### **Módulo 5: Gasto de bolsillo en acceso**

1) La última atención en salud de usted o algún miembro de su familia fue:

- 1. ☐ Consulta externa
- 2. ☐ Hospitalización
- 3. ☐ Urgencias
- 4. ☐ NS/NR

**Las siguientes preguntas se refieren a la ÚLTIMA VEZ que usted o algún miembro de su hogar recibió atención en salud (consulta externa, urgencias u hospitalización)**

2) ¿Usted pagó cuotas moderadoras y/o copagos por la última atención recibida?

- 0. ☐ NO
- 1. ☐ Si → Valor (cantidad en pesos) \$ \_\_\_\_\_
- 2. ☐ NS/NR

3) ¿Cuánto pagó en total por medicamentos, exámenes y procedimientos no autorizados o no entregados por la EPS?

- 0. ☐ NO
- 1. ☐ Si → Valor (cantidad en pesos) \$ \_\_\_\_\_
- 2. ☐ NS/NR

4) ¿Cuánto pagó en total por lentes, audífonos o aparatos ortopédicos (muletas, sillas de ruedas, etc.)?

- 0. ☐ NO
- 1. ☐ Si → Valor (cantidad en pesos) \$ \_\_\_\_\_
- 2. ☐ NS/NR

5) ¿Cuánto pagó en total en gastos extras como transporte, alojamientos y alimentación?

- 0. ☐ NO
- 1. ☐ Si → Valor (cantidad en pesos) \$ \_\_\_\_\_
- 2. ☐ NS/NR

6) Otros gastos. ¿Cuál? \_\_\_\_\_

- 0. ☐ NO
- 1. ☐ Si → Valor (cantidad en pesos) \$ \_\_\_\_\_
- 2. ☐ NS/NR

**Observaciones**

---

---

---

---

---

---

---

---

---

Nombre del encuestador: \_\_\_\_\_
